# Supplementary material for: Inflicting Significant Losses in Slaughtered Animals: Exposing the Hidden Effects of Parasitic Infections
Source: MDPI journal article supplement (doi:10.3390/pathogens12111291), 2023-10-29
Supplement: s1 [file s1]

Supplementary Table S1. Parasitic species present as singles, pairs, and combinations of three in ruminants of district Faisalabad

| <b>Parasitic Infection</b>                                          | <b>Positive out of 172</b> | <b>Prevalence</b> |
|---------------------------------------------------------------------|----------------------------|-------------------|
| <i>Eimeria</i> oocyst                                               | 26                         | 15.12             |
| <i>Trichuris</i>                                                    | 24                         | 13.95             |
| <i>Haemonchus</i>                                                   | 22                         | 12.79             |
| <i>Ostertagia</i>                                                   | 20                         | 11.63             |
| <i>Toxocara</i>                                                     | 9                          | 5.23              |
| <i>Strongyloides</i>                                                | 6                          | 3.49              |
| <i>Trichostrongylus</i>                                             | 5                          | 2.91              |
| Hydatid cysts + <i>Trichuris</i>                                    | 7                          | 4.07              |
| Hydatid cysts + <i>Eimeria</i> oocyst                               | 5                          | 2.91              |
| <i>Paramphistomum</i> + <i>Ostertagia</i>                           | 4                          | 2.33              |
| <i>Eimeria</i> oocyst + <i>Trichostrongylus</i>                     | 3                          | 1.74              |
| Hydatid cysts + <i>Ostertagia</i>                                   | 4                          | 2.33              |
| <i>Fasciola</i> + <i>Haemonchus</i>                                 | 2                          | 1.16              |
| Hydatid cysts + <i>Trichostrongylus</i>                             | 3                          | 1.74              |
| Hydatid cysts + <i>Haemonchus</i>                                   | 3                          | 1.74              |
| <i>Paramphistomum</i> + <i>Trichuris</i>                            | 3                          | 1.74              |
| <i>Haemonchus</i> + <i>Trichuris</i>                                | 2                          | 1.16              |
| <i>Paramphistomum</i> + <i>Toxocara</i>                             | 1                          | 0.58              |
| <i>Fasciola</i> + <i>Toxocara</i>                                   | 1                          | 0.58              |
| <i>Paramphistomum</i> + <i>Haemonchus</i>                           | 1                          | 0.58              |
| Hydatid cysts + <i>Toxocara</i>                                     | 1                          | 0.58              |
| Hydatid cysts + <i>Strongyloides</i>                                | 1                          | 0.58              |
| <i>Fasciola</i> + <i>Ostertagia</i>                                 | 1                          | 0.58              |
| <i>Paramphistomum</i> + <i>Eimeria</i> oocyst                       | 1                          | 0.58              |
| <i>Strongyloides</i> + <i>Toxocara</i>                              | 1                          | 0.58              |
| <i>Paramphistomum</i> + <i>Strongyloides</i>                        | 1                          | 0.58              |
| <i>Fasciola</i> + <i>Trichostrongylus</i>                           | 1                          | 0.58              |
| Hydatid cysts + <i>Haemonchus</i> + <i>Strongyloides</i>            | 2                          | 1.16              |
| <i>Haemonchus</i> + <i>Eimeria</i> oocyst + <i>Trichostrongylus</i> | 2                          | 1.16              |
| <i>Paramphistomum</i> + <i>Eimeria</i> oocyst + <i>Toxocara</i>     | 1                          | 0.58              |
| <i>Haemonchus</i> + <i>Eimeria</i> oocyst + <i>Trichuris</i>        | 1                          | 0.58              |
| <i>Paramphistomum</i> + Hydatid cysts + <i>Ostertagia</i>           | 1                          | 0.58              |
| <i>Fasciola</i> + <i>Haemonchus</i> + <i>Strongyloides</i>          | 1                          | 0.58              |
| <i>Paramphistomum</i> + Hydatid cysts + <i>Haemonchus</i>           | 1                          | 0.58              |
| Hydatid cysts + <i>Ostertagia</i> + <i>Eimeria</i> oocyst           | 1                          | 0.58              |
| Hydatid cysts + <i>Haemonchus</i> + <i>Eimeria</i> oocyst           | 1                          | 0.58              |
| Hydatid cysts + <i>Eimeria</i> oocyst + <i>Trichuris</i>            | 1                          | 0.58              |
| Hydatid cysts + <i>Haemonchus</i> + <i>Trichostrongylus</i>         | 1                          | 0.58              |
| <i>Paramphistomum</i> + <i>Haemonchus</i> + <i>Eimeria</i> oocyst   | 1                          | 0.58              |
